# Supplementary material
Source: PubMed Central journal article supplement (PMC5773387)
Supplement: NIHMS928724-supplement.pdf [file NIHMS928724-supplement.pdf]

**Supplemental Material: Yang et al.**

**Figure S1. Anatomical characterization of NAcMed and NAcLat inputs to the VTA in A2a-Cre mice, Related to Figure 1.**

(A) Schematic showing dual injection of AAVs expressing eYFP or mCherry into the NAcMed (medial shell of nucleus accumbens) and NAcLat (lateral shell of nucleus accumbens) of A2a-Cre mice, respectively.

(B) Fluorescence image showing eYFP-expression (green, 488 nm) in the NAcMed and mCherry-expression (red, 546 nm) in the NAcLat of a A2a-Cre mouse (blue: DAPI staining; aca: anterior commissure, CPu: caudate putamen, LS: lateral septum; Scale bar 50  $\mu$ m).

(C) Fluorescence image of a coronal midbrain section showing TH-immunostaining (647 nm, blue) but absence of eYFP-expressing NAcMed terminals and mCherry-expressing NAcLat terminals (TH: tyrosine-hydroxylase, mVTA: medial VTA, lVTA: lateral VTA, IPN: interpeduncular nucleus, ml: medial lemniscus, SNc: substantia nigra pars compacta; Scale bar 50  $\mu$ m).

**Figure S2. Synaptic connectivity of NAc subnuclei with VTA DAergic and GABAergic subpopulations, Related to Figure 3.**

(A) Sample confocal images from NAcLat terminal stimulation experiments in which individual retrogradely labeled neurons (546 nm, beads, red) were filled with neurobiotin (NB; 488 nm, green) via the recording pipette and immunostained for tyrosine-hydroxylase (TH; 647 nm, blue) (Scale bar 50  $\mu$ m).

(B) Sample confocal images from NAcMed terminal stimulation experiments in which individual retrogradely labeled neurons (546 nm, beads, red) were filled with neurobiotin (NB; 488 nm, green) via the recording pipette and immunostained for tyrosine-hydroxylase (TH; 647 nm, blue) (Scale bar 50  $\mu$ m).

(C) Schematic of AAV injection into the NAcMed or NAcLat of GAD2-tdTomato (GAD2-tdT) mice and *ex vivo* whole-cell patch-clamp recordings of tdTomato-expressing VTA neurons.

(D) Representative light-evoked inhibitory postsynaptic currents (IPSCs) recorded from tdTomato-expressing cells in the VTA for stimulation of NAcLat (upper trace) and NAcMed (lower trace) terminals in the VTA. The mean amplitude of light-evoked IPSCs recorded from GAD2-tdT-positive VTA neurons is significantly larger when stimulating NAcLat terminals in

the VTA compared to NAcMed terminal stimulation (\*  $p = 0.0352$ ) (Data represent means  $\pm$  SEM).

(E) Sample confocal images from NAcMed (upper panel) and NAcLat (lower panel) terminal stimulation experiments in which individual GAD2-tdT-positive (546 nm, red) cells in the VTA were filled with neurobiotin (NB; 488 nm, green) via the recording pipette (Scale bar 50  $\mu$ m).

(F) Bar graph showing that the percentage of GAD2-tdT-positive VTA cells responding to light stimulation is higher when the recording location in the VTA was matched with the respective NAc subregion. For example, the probability of recording light-evoked IPSCs was higher when NAcMed terminals were stimulated and the recorded cell was located in the mVTA, and lower when it was located in the IVTA. The opposite applies for NAcLat terminal stimulation.

(G) Schematic showing dual injection of AAVs expressing eYFP into the NAcMed and mCherry into the VTA of GAD2-Cre mice, respectively (upper left panel). Fluorescence image showing eYFP-expression (green, 488 nm) in the NAcMed of a GAD2-Cre mouse (blue: DAPI staining; lower left panel). Confocal images of coronal midbrain sections showing TH-immunostaining (647 nm, blue) in the lateral VTA (IVTA, middle panel) and medial VTA (mVTA, right panel). Note that eYFP-expressing NAcMed terminals are located in close proximity of mCherry-positive cells (i.e., GABAergic neurons; white arrow heads) in the mVTA but not IVTA (Scale bar 50  $\mu$ m).

(H) Same approach as in (G), but for injection of AAVs expressing eYFP into the NAcLat and mCherry into the VTA of GAD2-Cre mice. Note that eYFP-expressing NAcLat terminals are located in close proximity of mCherry-positive cells (i.e., GABAergic neurons; white arrow heads) in the IVTA but not mVTA (Scale bar 50  $\mu$ m).

(I) Schematic showing dual injection of red retrobeads into the NAcMed and NAcLat, AAV injection into the VTA and *ex vivo* whole-cell patch-clamp recordings of retrogradely labeled NAcMed- and NAcLat-projecting VTA DA neurons in GAD2-Cre mice.

(J) Representative light-evoked IPSCs recorded from a NAcLat-projecting DA neuron (upper trace) and NAcMed-projecting DA neuron (lower trace) in response to light stimulation of GABAergic terminals in the VTA. Light-evoked IPSCs were blocked by bath application of 50  $\mu$ M picrotoxin (PCTX, red traces). The mean amplitude of light-evoked IPSCs recorded from NAcLat-projecting DA neurons is significantly larger compared to NAcMed-projecting DA neurons (\*\*\*)  $p = 0.0005$ ) (Data represent means  $\pm$  SEM).

**Figure S3. Complete serial reconstructions of AAV injection sites and optical fiber placements for behavioral experiments shown in Figures 4 and 5.**

(A) Schematic drawings showing rostro-caudal distribution for ChR2-eYFP expression of mice injected with AAVs into the NAcMed (solid lines) or NAcLat (dashed lines) as well as corresponding optical fiber placements in the midbrain (solid lines for mice injected with AAVs into NAcMed and dashed lines for mice injected with AAVs into NAcLat). Different colors are used to outline the brains regions in which ChR2-EYFP was detected as well as for the placements of the optical fiber with each color representing the expression profile and fiber placement from a single animal.

(B) Representative fluorescence images showing ChR2-eYFP expression (488 nm, green) of mice injected with AAV-DIO-ChR2-eYFP in the NAcMed along the rostro-caudal axis of the ventral striatum (blue: DAPI staining) (Scale bar 100  $\mu$ m).

(C) Same as in (B) but for mice injected with AAV-DIO-ChR2-eYFP into NAcLat (Scale bar 100  $\mu$ m).

**Figure S4. Assessment of locomotor behavior in response to *in vivo* optogenetic stimulation of NAcLat and NAcMed terminals in the VTA, Related to Figures 4 and 5.**

(A) Schematic of open field test, which involves 20 Hz light stimulation of NAcLat terminals in the VTA of D1-Cre mice during a 3-min light-on epoch (upper left panel). Representative trajectory of an animal during the initial 3-min light-off epoch (lower left panel), during the 3-min light-on epoch (upper right panel) and final 3-min light-off epoch (lower right panel). The bar graphs show that light stimulation of NAcLat terminals in the VTA did not significantly alter track length (left; off:  $374.1 \pm 61.27$  cm, on:  $542.7 \pm 79.11$  cm, off:  $237.7 \pm 45.18$  cm,  $n = 9$ , RM one-way ANOVA,  $p_{\text{off vs. on}} = 0.2881$ ,  $p_{\text{off vs. off}} = 0.0565$ ,  $p_{\text{on vs. off}} = 0.0675$ ), velocity (middle; off:  $2.08 \pm 0.34$  cm/s, on:  $3.01 \pm 0.44$  cm/s, off:  $1.32 \pm 0.25$  cm/s,  $n = 9$ ; RM one-way ANOVA,  $p_{\text{off vs. on}} = 0.302$ ,  $p_{\text{off vs. off}} = 0.0546$ ,  $p_{\text{on vs. off}} = 0.0702$ ) and time spent in center (right; off:  $3.62 \pm 1.37$  s, on:  $4.44 \pm 1.29$ , off:  $7.28 \pm 3.44$ ,  $n = 9$ ; RM one-way ANOVA,  $p_{\text{off vs. on}} = 0.6876$ ,  $p_{\text{off vs. off}} = 0.3717$ ,  $p_{\text{on vs. off}} = 0.5364$ ) (Data represent means  $\pm$  SEM).

(B) Same approach as in (A) but for light stimulation of NAcMed terminals. Note that stimulation of NAcMed terminals significantly reduced track length (left; off:  $675.5 \pm 155.7$  cm, on:  $903.4 \pm 133.9$  cm, off:  $210.1 \pm 80.99$  cm,  $n = 10$ , RM one-way ANOVA,  $p_{\text{off vs. on}} = 0.263$ , \*\*  $p_{\text{off vs. off}} = 0.0031$ , \*\*\*  $p_{\text{on vs. off}} = 0.0006$ ) and velocity (middle; off:  $3.76 \pm 0.87$  cm/s, on:  $5.02 \pm$

0.74 cm/s, off:  $1.17 \pm 0.45$  cm/s,  $n = 10$ ; RM one-way ANOVA,  $p_{\text{off vs. on}} = 0.2646$ , \*\*  $p_{\text{off vs. off}} = 0.003$ , \*\*\*  $p_{\text{on vs. off}} = 0.0005$ ) in the last 3-min light-off epoch. However, no significant changes were observed in time spent in center area (right; off:  $3.82 \pm 0.85$  s, on:  $9.25 \pm 2.45$ , off:  $5.31 \pm 2.14$ ,  $n = 10$ ; RM one-way ANOVA,  $p_{\text{off vs. on}} = 0.1505$ ,  $p_{\text{off vs. off}} = 0.8191$ ,  $p_{\text{on vs. off}} = 0.0614$ ) (Data represent means  $\pm$  SEM).

**Figure S5. Optogenetic silencing of NAcLat terminals in the VTA, Related to Figure 4.**

(A) Schematic of AAV injection into the NAcLat of D1-Cre mice and inhibition of NAcLat terminals in the VTA.

(B) Schematic of real-time place preference assay, which involves switching of light stimulated compartments after 10 min.

(C) Trajectory of a mouse that received terminal inhibition in one compartment (top panel) for the initial 10 min period and then received terminal inhibition in the other compartment (lower panel) for an additional 10 min.

(D) Bar graph showing that inhibition of NAcLat terminals does not significantly alter place preference behavior (non-stim.:  $560.4 \pm 31.16$  s, stim.:  $483.4 \pm 47.64$  s,  $n = 6$ ;  $p = 0.3376$ ) (Data represent means  $\pm$  SEM).

(E) Bar graph showing that inhibition of NAcLat terminals does not significantly alter number of compartment entries (non-stim.:  $17.17 \pm 4.6$ , stim.:  $13.67 \pm 2.91$ ,  $n = 6$ ;  $p = 0.121$ ) (Data represent means  $\pm$  SEM).

**Figure S6. Analysis of GABA<sub>B</sub> receptor transmission in VGLUT2-expressing VTA cell populations, Related to Figure 6.**

(A) Schematic showing AAV injection into the lateral VTA (lVTA) and green retrobead injection into the NAcLat of VGLUT2-Cre mice to investigate VGLUT2 expression in NAcLat-projecting DA neurons.

(B) Confocal images showing VGLUT2-expressing (mCherry-positive, red) neurons in the caudal midbrain at low (left, scale bar 200  $\mu\text{m}$ ) and high (right, scale bar 10  $\mu\text{m}$ ) magnification. Most NAcLat-projecting (beads, green) DA (TH-positive, blue) neurons do not co-express VGLUT2.

(C-D) Same as in (A-B) but for AAV injection into the medial VTA (mVTA) and green retrobead injection into the NAcMed. Most NAcMed-projecting DA neurons co-express

VGLUT2.

(E) Summary of VGLUT2-expression analysis for NAcMed- and NAcLat-projecting DA neurons (NAcMed: n = 162 cells (from n = 3 mice), mCherry+ TH+ = 58.02%, mCherry+ TH- = 5.56%, mCherry- TH+ = 33.95%, mCherry+ TH- = 2.47%; NAcLat: n = 180 cells (from n = 4 mice), mCherry+ TH+ = 15.56%, mCherry+ TH- = 5%, mCherry- TH+ = 77.22%, mCherry- TH- = 2.22%, Chi-square (71.33), \*\*\* p < 0.0001).

(F) Confocal images of the rostral midbrain in low (left, scale bar 100  $\mu$ m) and high (right, scale bar 10  $\mu$ m) magnification showing a large number of VGLUT2-positive, TH-negative cells in the rostral VTA (rVTA).

(G) Schematic showing AAV injection into the VTA of VGLUT2-Cre mice and *ex vivo* whole-cell patch-clamp recordings of mCherry (i.e., VGLUT2)-expressing VTA neurons.

(H) Outward currents (recorded at -55 mV, in 50  $\mu$ M picrotoxin, 20  $\mu$ M CNQX, 50  $\mu$ M D-AP5) are plotted as a function of time for VGLUT2+ TH- (white circles) and VGLUT2+ TH+ (grey circles) VTA neurons. Bath application of 100  $\mu$ M baclofen induces a small outward current in both populations, which is comparable to the current observed in NAcMed-projecting DA neurons (Figure 6B) (Data represent means  $\pm$  SEM).

(I) Bar graph showing no significant difference in peak outward currents evoked by baclofen between VGLUT2+ TH- and VGLUT2+ TH+ VTA neurons (VGLUT2+ TH-  $35.03 \pm 12.36$  pA, n = 9; VGLUT2+ TH+  $23.38 \pm 8.14$  pA, n = 8; p = 0.4558) (Data represent means  $\pm$  SEM).

(J) Anatomical locations of all recorded neurons. Note, that most VGLUT2+ TH+ neurons are located in the mVTA of the caudal midbrain, while VGLUT2- TH- neurons are mainly located in the rostral midbrain.

(K) Sample confocal images for recordings from VGLUT2-expressing (mCherry-positive, red) and neurobiotin-filled cells (NB, green) that are TH-immunonegative (upper row) or TH-immunopositive (blue, lower row) (Scale bar 50  $\mu$ m).

**Figure S7. Optogenetic stimulation of NAcLat terminals in the VTA does not elicit GABA<sub>B</sub> receptor-mediated currents in NAcLat- and NAcMed-projecting DA neurons, Related to Figure 6.**

(A) Schematic of AAV injection into NAcLat and red retrobead injection into NAcMed and NAcLat of D1-Cre mice. Whole-cell patch clamp recordings were performed from retrogradely labeled neurons in different VTA subregions while stimulating NAcLat terminals in the VTA.

(B) No detectable outward currents in response to 20 Hz light stimulation of NAcLat terminals in NAcLat- (upper panel, n = 7 cells) and NAcMed-projecting (lower panel, n = 3 cells) DA neurons (cells held at -55 mV; recorded in 50  $\mu$ M picrotoxin, 20  $\mu$ M CNQX, 50  $\mu$ M D-AP5).

(C) Left: Sample whole-cell patch clamp recordings of spontaneous firing from a NAcLat-projecting DA neuron and 20 Hz light stimulation of NAcLat terminals before (black trace) and after (red trace) bath application of 100  $\mu$ M CGP35348. Right: Bar graph showing the mean firing frequency of NAcLat-projecting DA neurons before (off, white bar) and during 20 Hz light stimulation (blue bars) of NAcLat terminals in the VTA (off:  $0.51 \pm 0.14$  Hz; ACSF:  $1.81 \pm 0.41$  Hz; CGP:  $1.76 \pm 0.42$  Hz, n = 9; RM one-way ANOVA, \*  $p_{\text{off vs. ACSF}} = 0.0276$ , \*  $p_{\text{off vs. CGP}} = 0.0435$ ,  $p_{\text{ACSF vs. CGP}} = 0.6627$ ) (Data represent means  $\pm$  SEM).

(D) Same as in (C), but recordings were performed from NAcMed-projecting DA neurons (off:  $3.6 \pm 0.71$  Hz; ACSF:  $3.74 \pm 0.65$  Hz; CGP:  $2.29 \pm 0.35$  Hz, n = 14; RM one-way ANOVA,  $p_{\text{off vs. ACSF}} = 0.5225$ ,  $p_{\text{off vs. CGP}} = 0.1285$ ,  $p_{\text{ACSF vs. CGP}} = 0.0511$ ) (Data represent means  $\pm$  SEM).

**Figure S8. Complete serial reconstructions of AAV injection sites and placements of the optofluidic system for behavioral experiments shown in Figure 7.**

Left panels show representative fluorescence images of ChR2-eYFP expression (488 nm, green) in the NAcMed (A, Scale bar 50  $\mu$ m) and a coronal midbrain section showing TH-immunofluorescence (red, 546 nm), ChR2-eYFP expressing NAcMed terminals as well as optofluidic system placement (B, Scale bar 100  $\mu$ m). Right panels show schematic drawings of the rostro-caudal distribution for ChR2-eYFP expression of mice injected with AAVs into the NAcMed (A) and corresponding optofluidic system placements in the ventral midbrain (B). Different colors are used to outline the brains regions in which ChR2-eYFP was detected and for the placements of the optofluidic system with each color representing the expression profile and placement from a single animal (RLi: rostral linear nucleus, SNr: substantia nigra pars reticulata, ml: medial lemniscus, PAG: periaqueductal gray, MS: medial septum, LV: lateral ventricle)

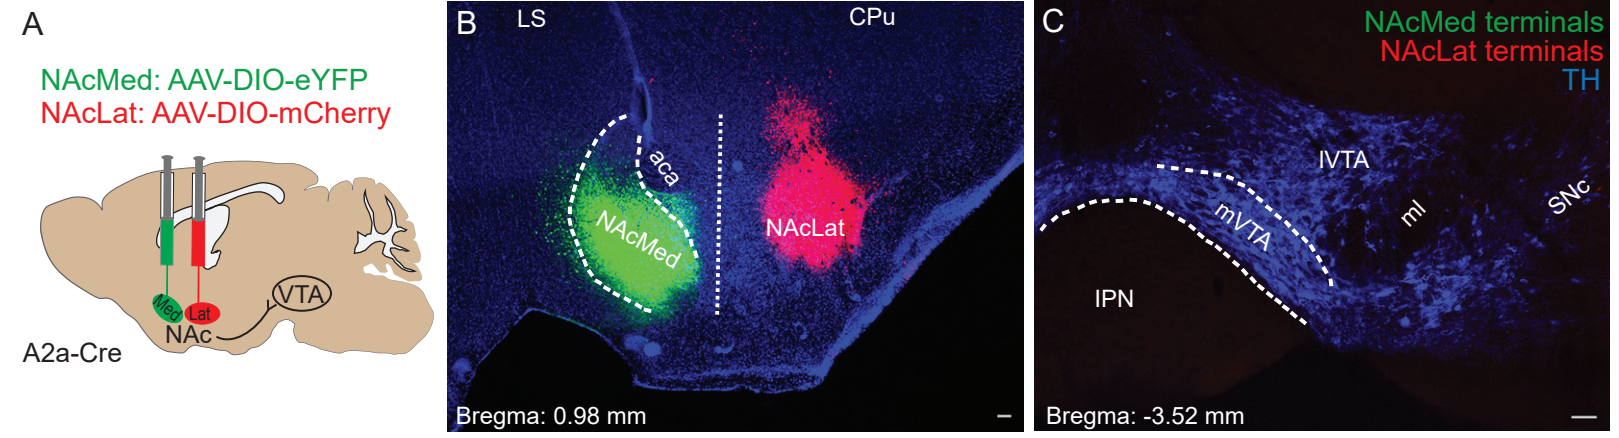

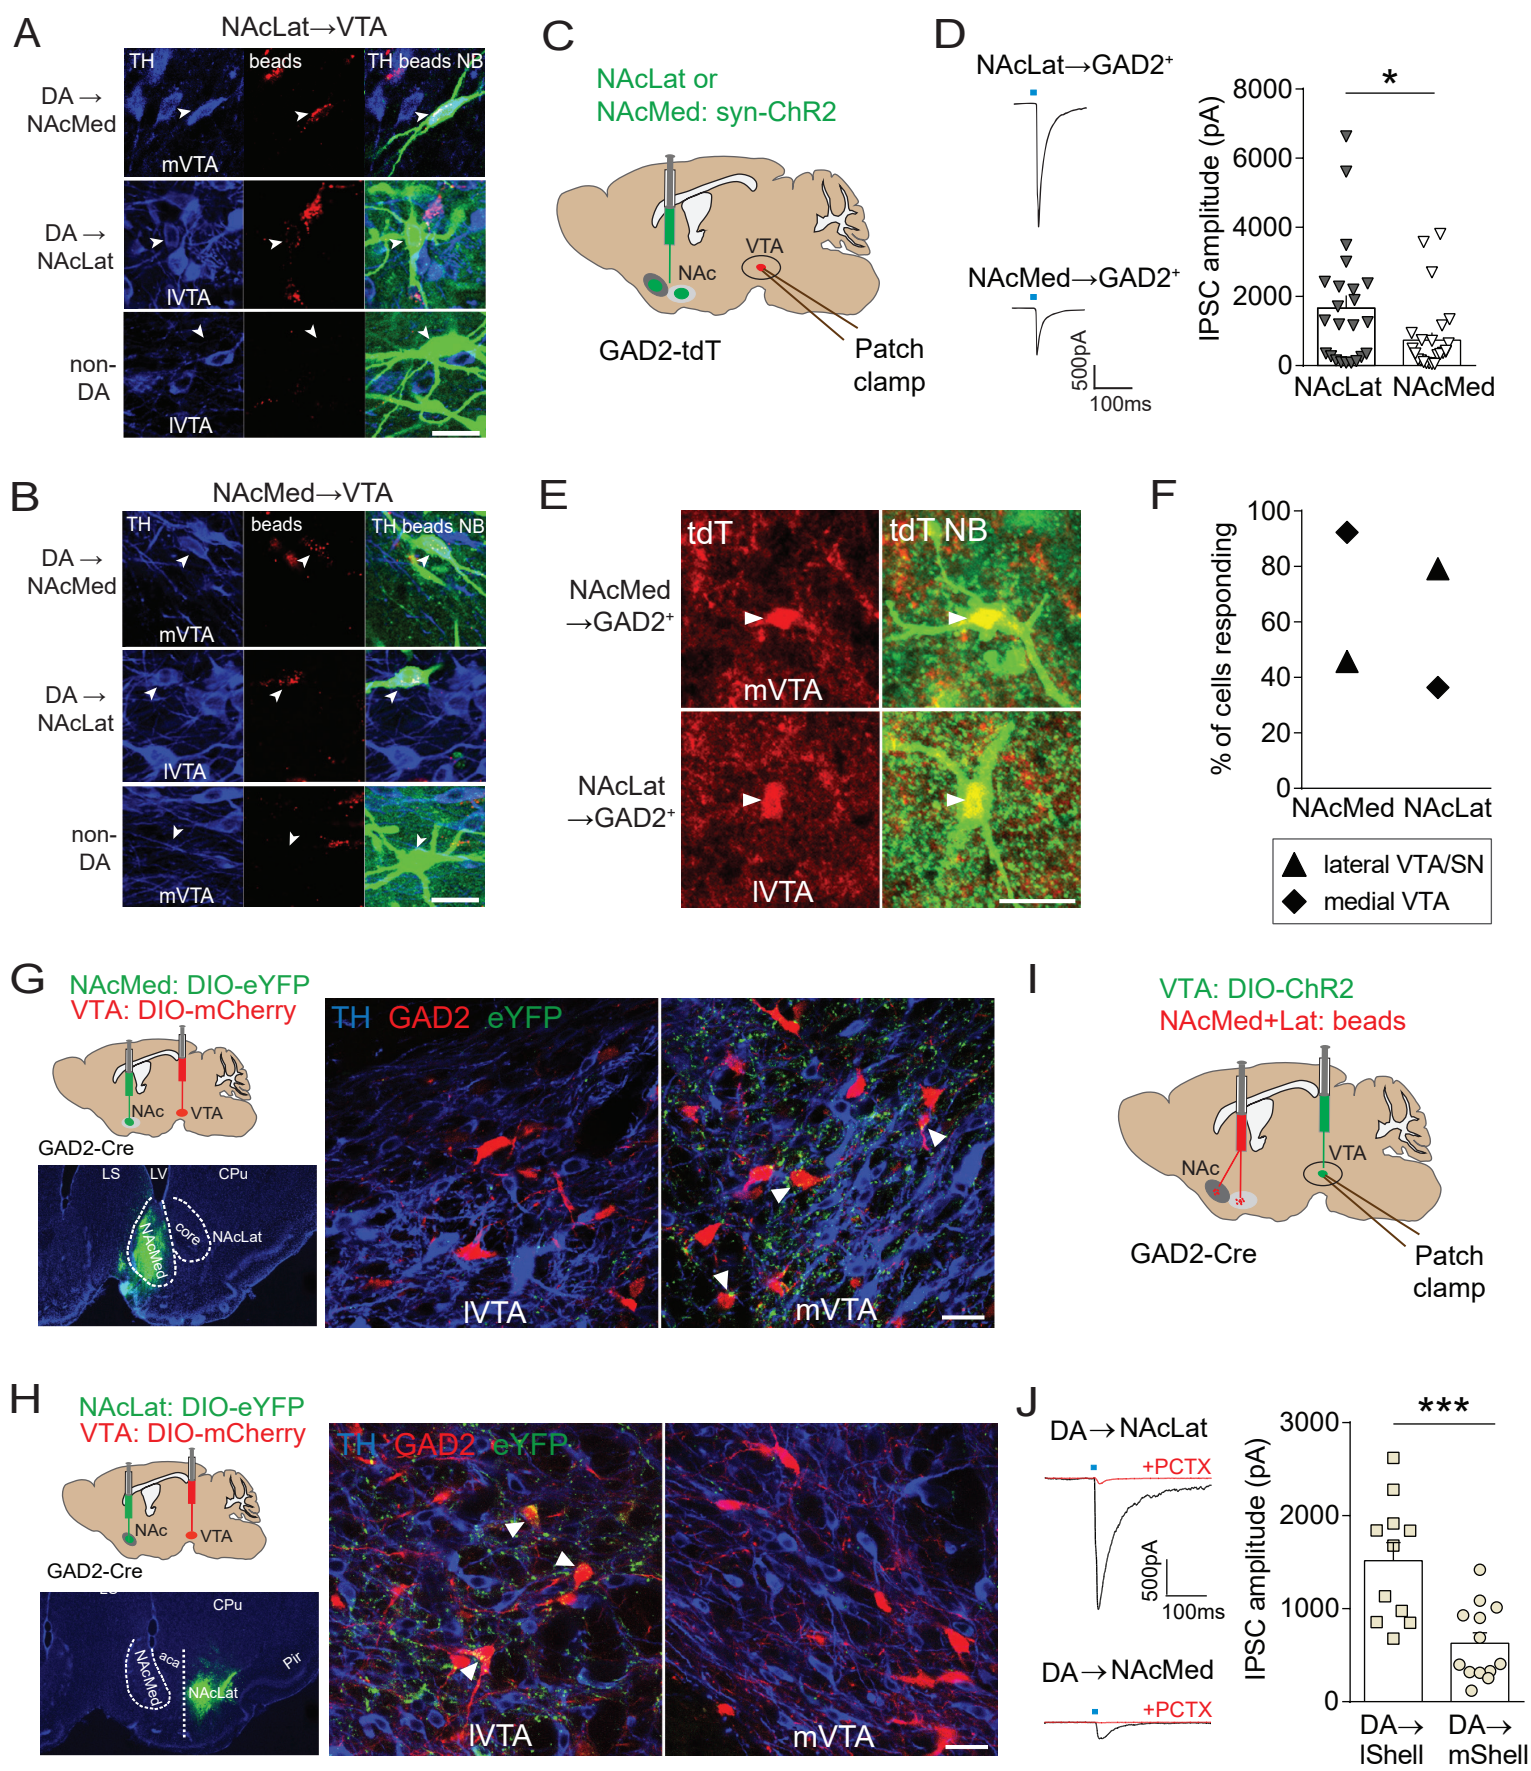



A

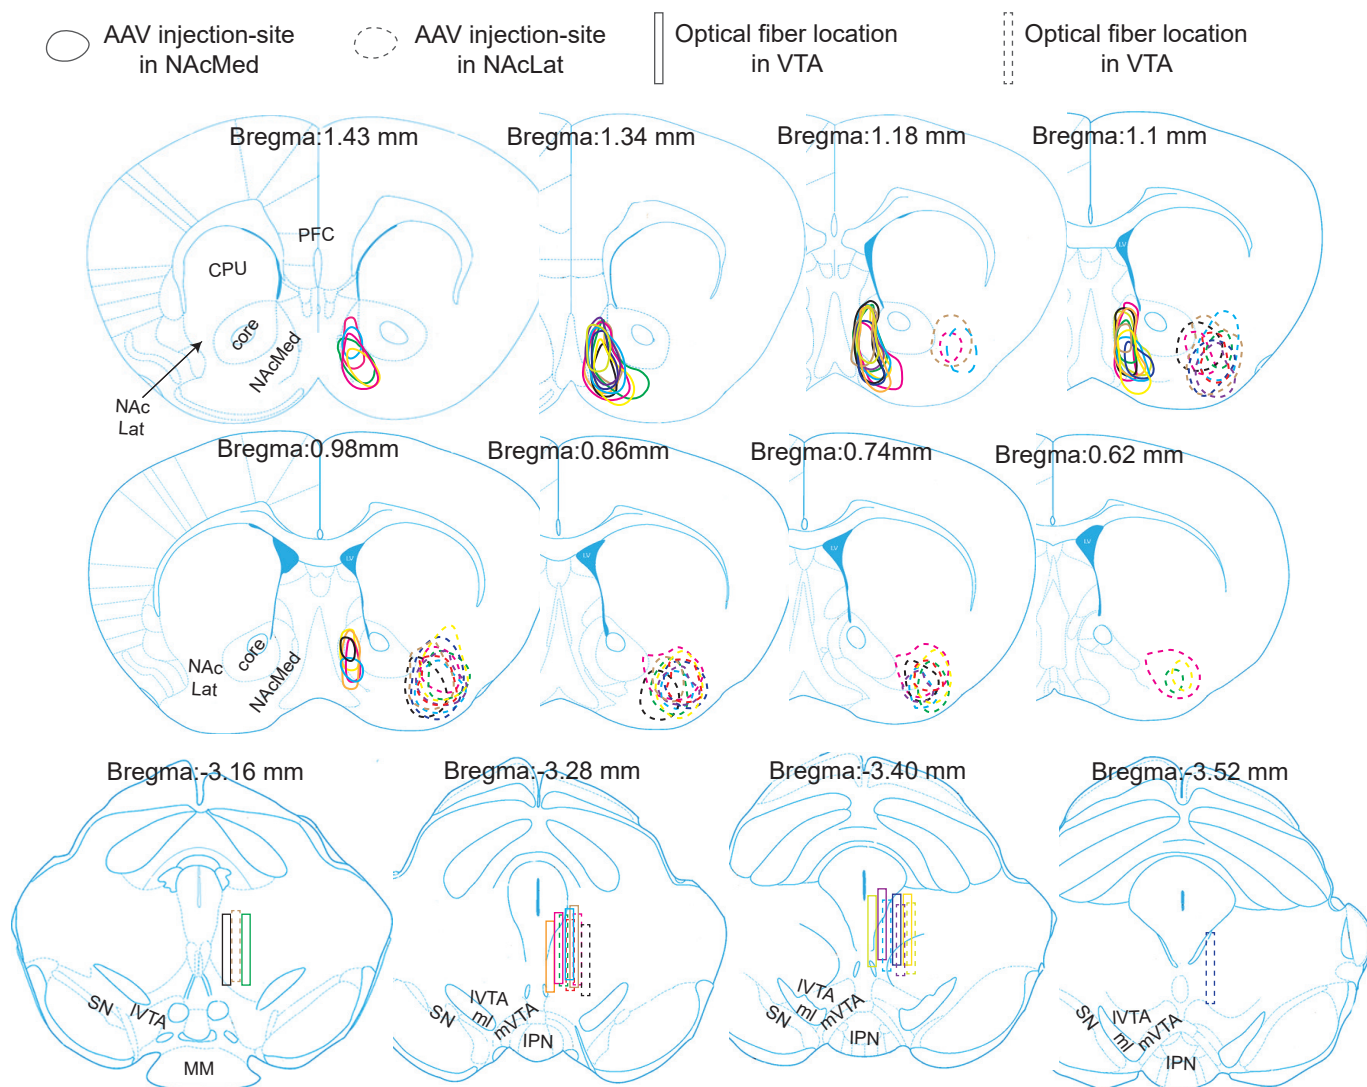

B

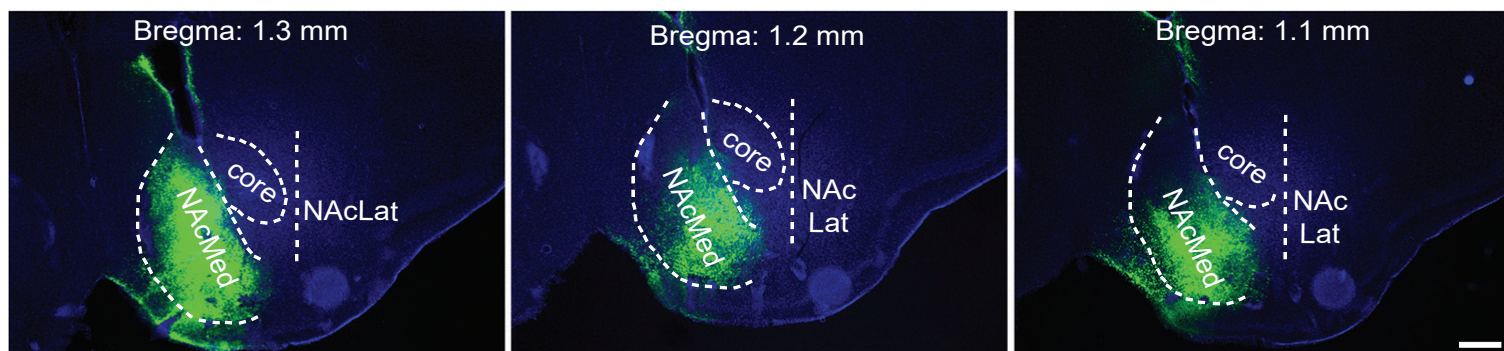

C

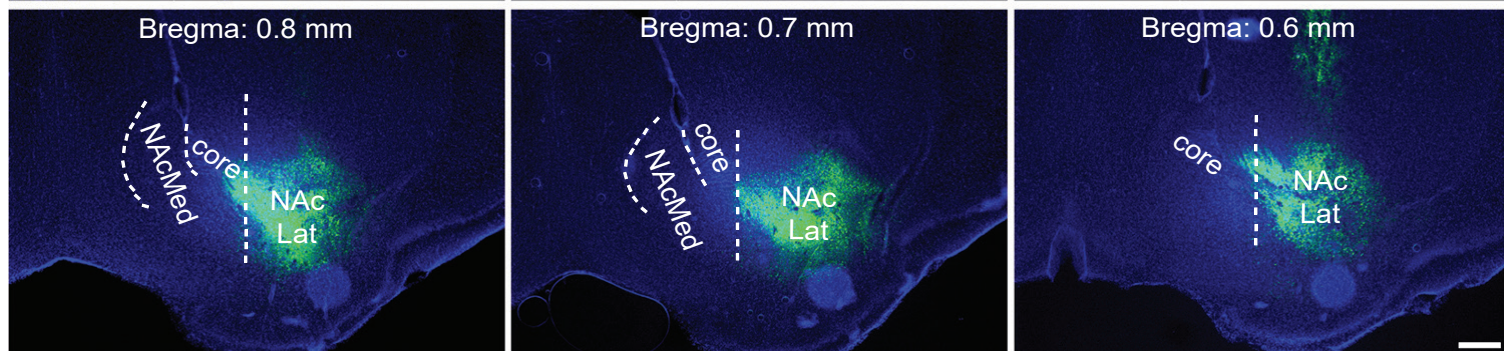

A

NAcLat<sub>D1-Cre</sub> → VTA

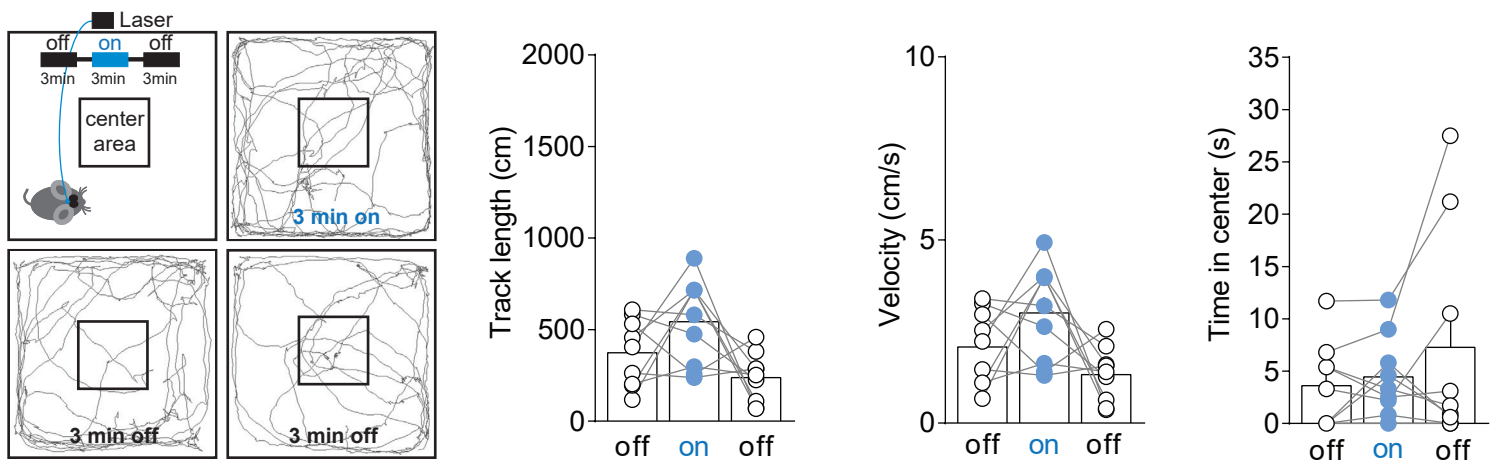

B

NAcMed<sub>D1-Cre</sub> → VTA

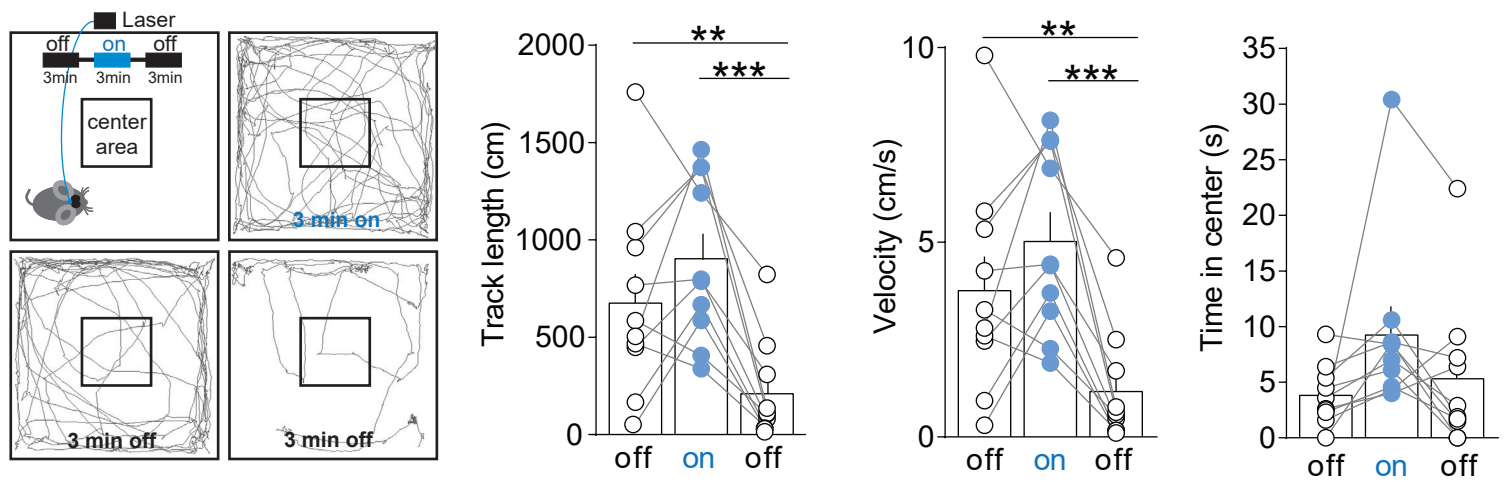

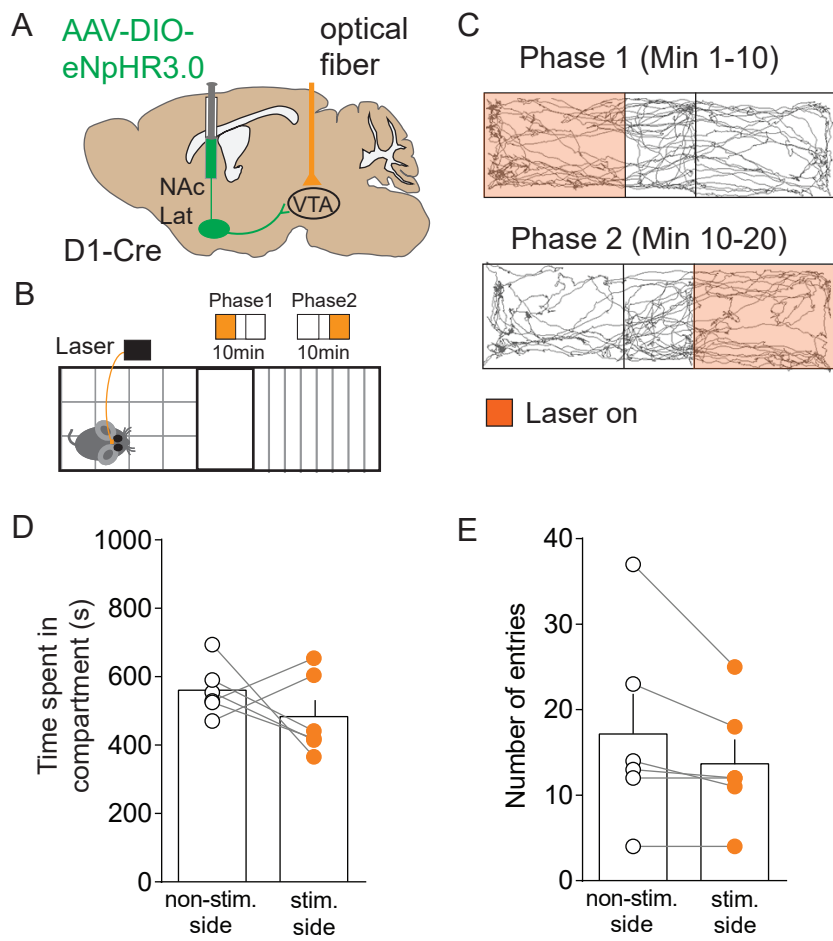

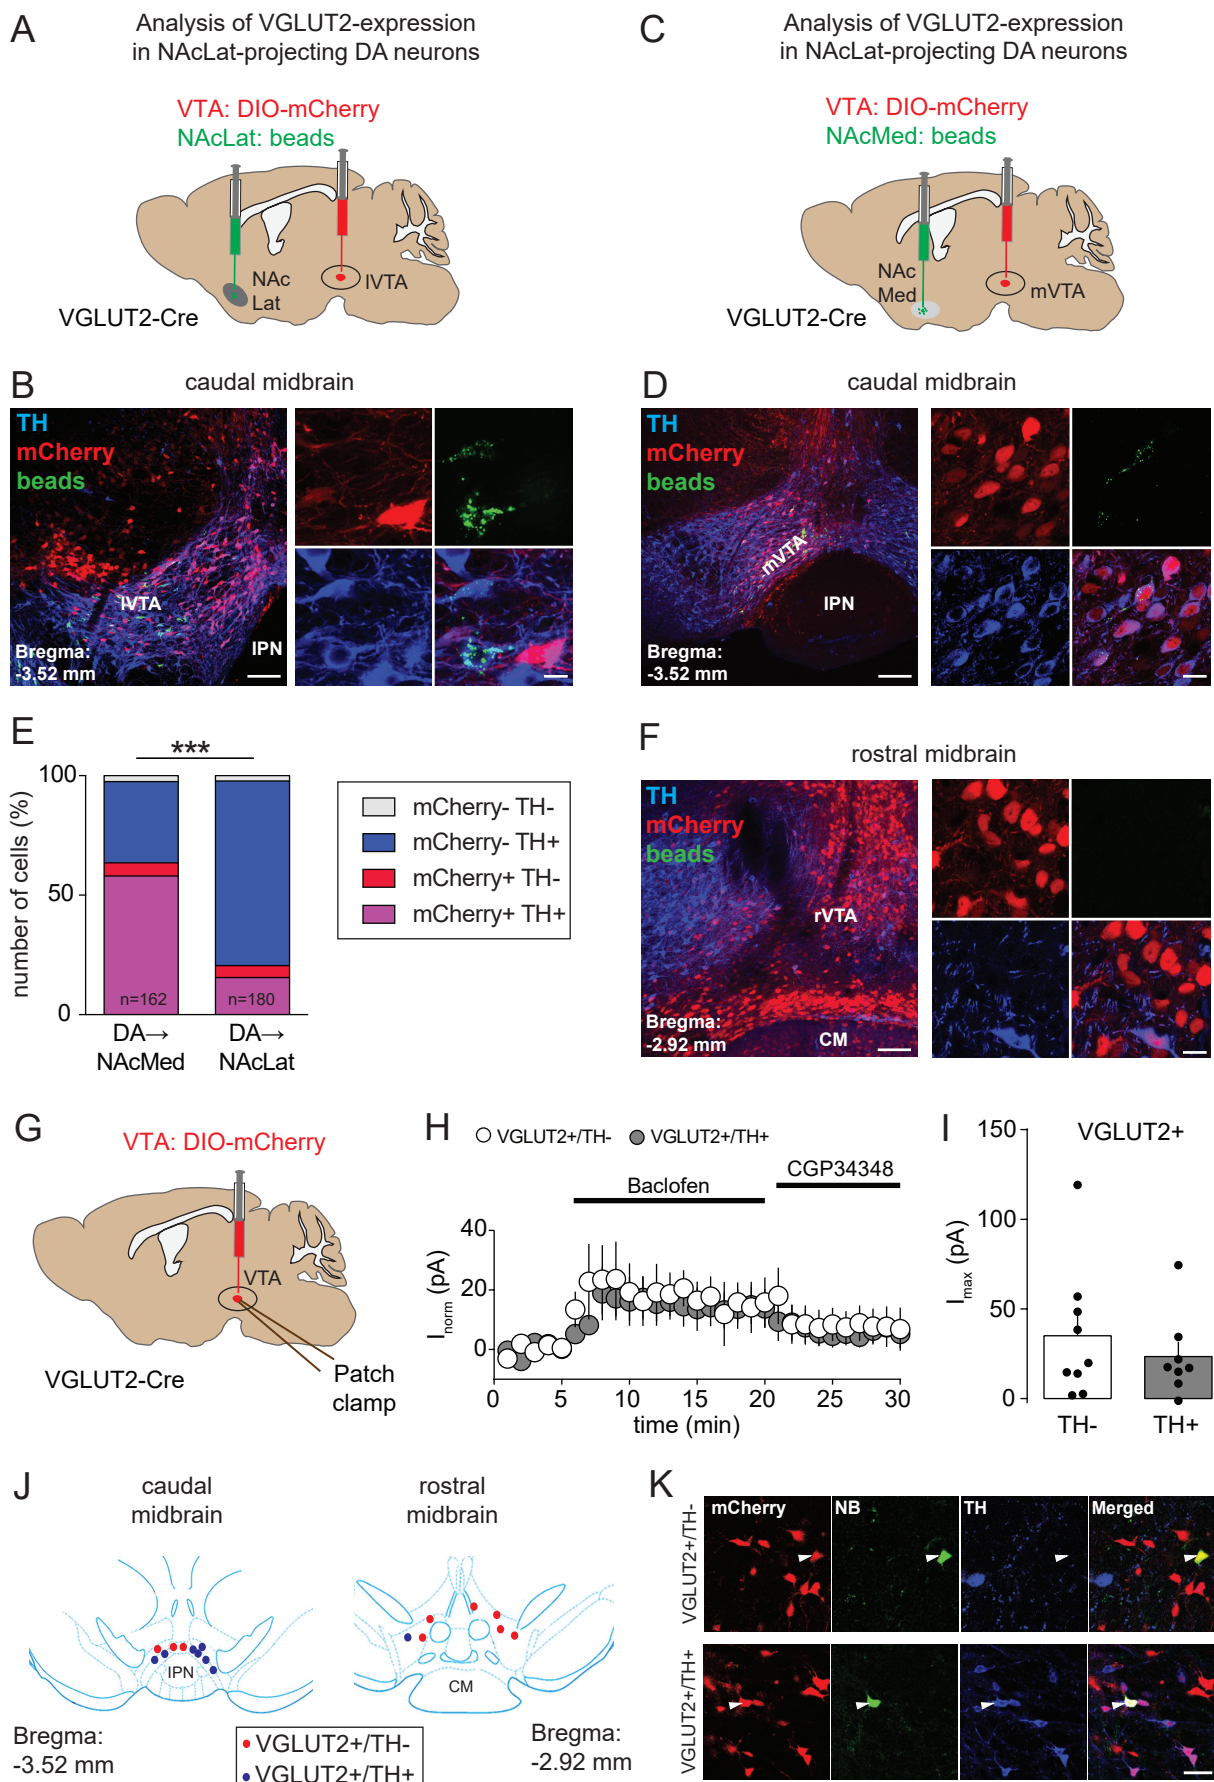

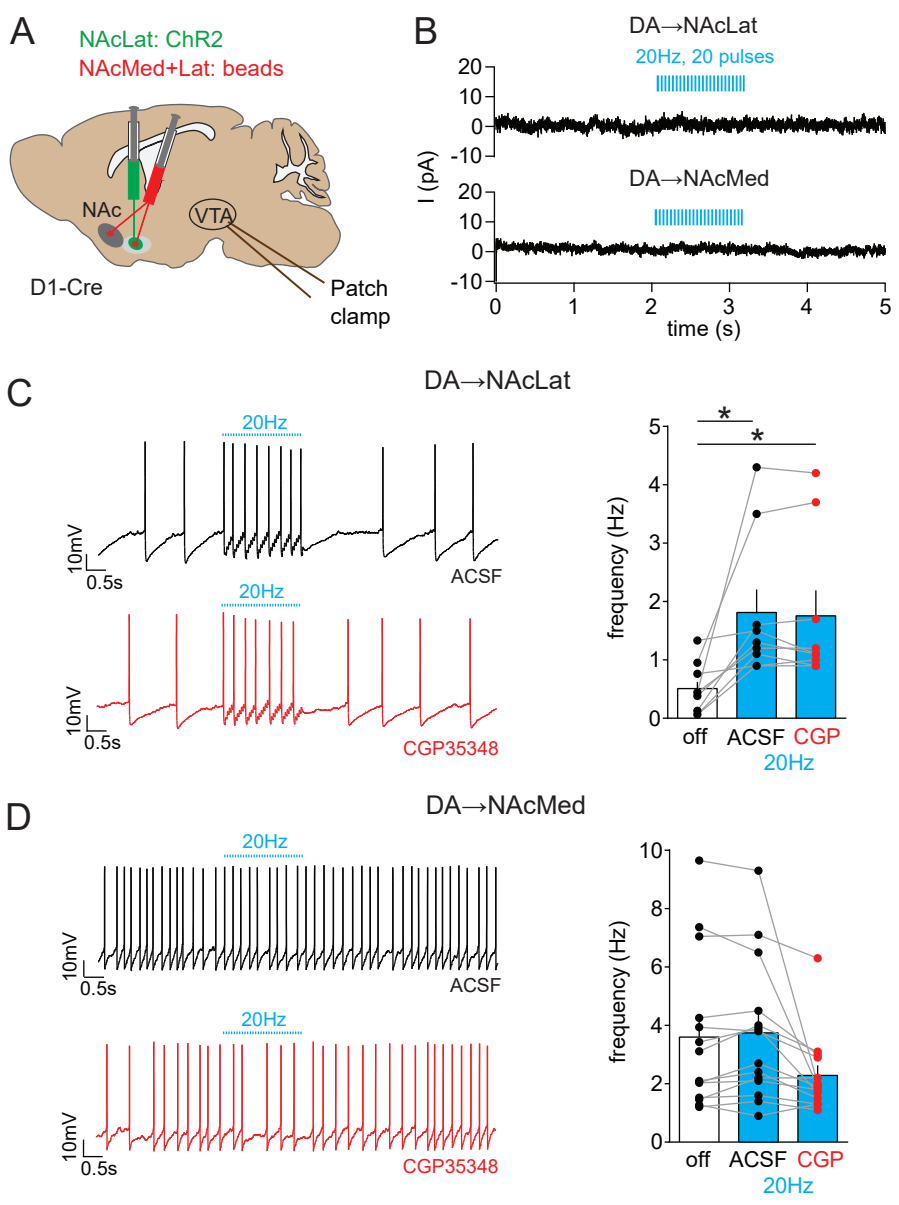

A

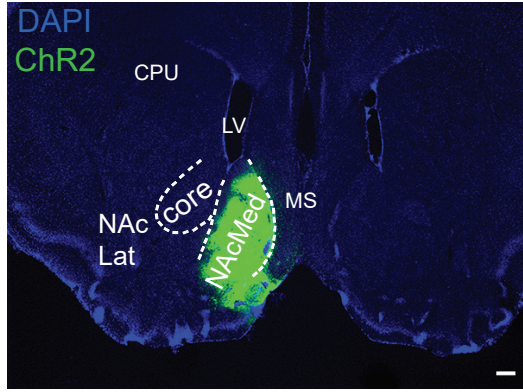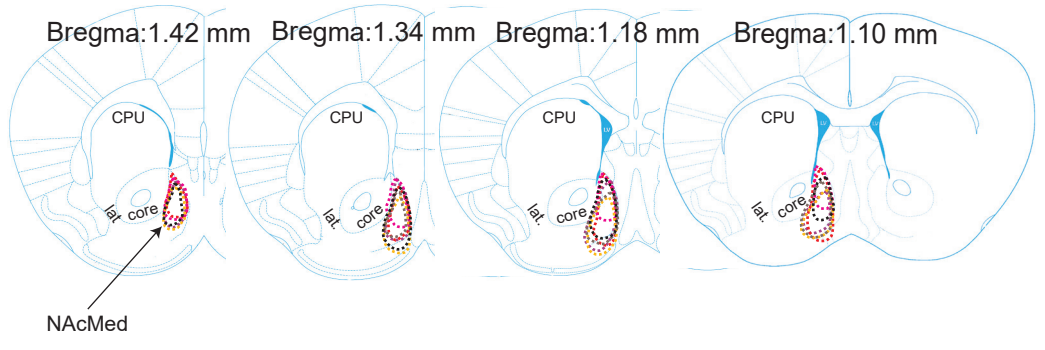

B

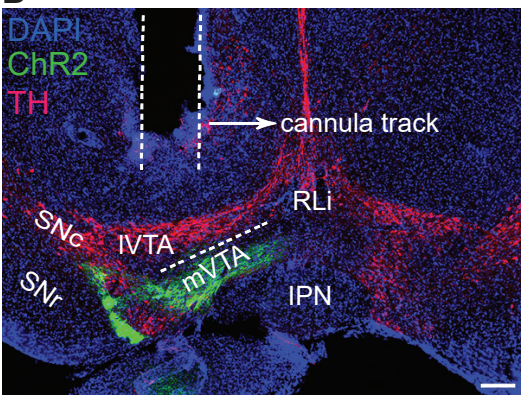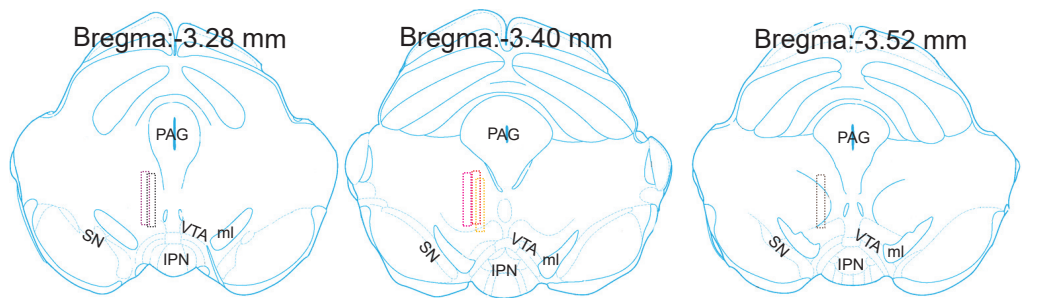

**Table S1. Summary of statistical analysis**

| <b>Data:</b>     | <b>Statistical Test:</b>                                    | <b>n</b>                                                                                               | <b>outcome measure</b>        | <b>p value</b>                                                                                                                     |
|------------------|-------------------------------------------------------------|--------------------------------------------------------------------------------------------------------|-------------------------------|------------------------------------------------------------------------------------------------------------------------------------|
| <i>Figure 1E</i> | Unpaired t-test                                             | NAcMed: 3 mice; average of 4 images for each mice<br>NAcLat: 3 mice; average of 4 images for each mice | Fluorescence (%)              | NAcMed->mVTA vs NAcMed->IVTA: 0.0026<br>NAcLat->mVTA vs NAcLat->IVTA: 0.0237                                                       |
| <i>Figure 2E</i> | Unpaired t-test                                             | 8 cells from 3 mice                                                                                    | mIPSCs amplitude              | 0.4414                                                                                                                             |
| <i>Figure 2F</i> | Unpaired t-test                                             | 8 cells from 3 mice                                                                                    | Firing frequency              | <0.0001                                                                                                                            |
| <i>Figure 3B</i> | Unpaired t-test                                             | 7 cells (DA->NAcMed)<br>24 cells (DA->NAcLat)<br>from 4 mice                                           | IPSC amplitude                | 0.5879                                                                                                                             |
| <i>Figure 3C</i> | Paired t-test                                               | 10 cells from 4 mice                                                                                   | IPSC amplitude                | 0.0173                                                                                                                             |
| <i>Figure 3D</i> | Unpaired t-test                                             | 13 cells (DA->NAcLat)<br>5 cells (non DA)<br>from 3 mice                                               | IPSC amplitude                | 0.0007                                                                                                                             |
| <i>Figure 3F</i> | One-way repeated measures ANOVA with Tukey's post hoc test. | 20 cells from 7 mice                                                                                   | Firing frequency              | Effect of stimulation: 0.0001<br>Post hoc:<br>off vs on: 0.0002<br>off vs off: 0.5163<br>on vs off: 0.0004                         |
| <i>Figure 3H</i> | Unpaired t-test                                             | 15 cells (DA->NAcMed)<br>7 cells (DA->NAcLat)<br>from 5 mice.                                          | IPSC amplitude                | 0.018                                                                                                                              |
| <i>Figure 3I</i> | Paired t-test                                               | 6 cells from 5 mice                                                                                    | IPSC amplitude                | 0.0129                                                                                                                             |
| <i>Figure 3J</i> | Unpaired t-test                                             | 10 cells (DA->NAcMed)<br>7 cells (non DA)<br>from 3 mice                                               | IPSC amplitude                | 0.161                                                                                                                              |
| <i>Figure 3L</i> | One-way repeated measures ANOVA with Tukey's post hoc test. | 17 cells from 6 mice                                                                                   | Firing frequency              | Effect of stimulation: 0.0079<br>Post hoc:<br>off vs on: 0.0258<br>off vs off: 0.9054<br>on vs off: 0.0298                         |
| <i>Figure 4F</i> | Paired t-test                                               | 9 mice                                                                                                 | Time spent in compartment     | 0.0001                                                                                                                             |
| <i>Figure 4G</i> | Paired t-test                                               | 9 mice                                                                                                 | Number of entries             | 0.0038                                                                                                                             |
| <i>Figure 4H</i> | Unpaired t-test                                             | 9 mice (Chr2)<br>6 mice (eYFP)                                                                         | Nosepokes                     | 0.0021                                                                                                                             |
| <i>Figure 4I</i> | One-way repeated measures ANOVA with Tukey's post hoc test. | 8 mice                                                                                                 | Time spent in open arms       | Effect of stimulation: 0.2618<br>Post hoc:<br>off1 vs 20hz: 0.2473<br>20hz vs off2: 0.9662<br>off1 vs off2: 0.2688                 |
| <i>Figure 5F</i> | Paired t-test                                               | 10 mice                                                                                                | Time spent in compartment     | 0.6897                                                                                                                             |
| <i>Figure 5G</i> | Unpaired t-test                                             | 10 mice (Chr2)<br>6 mice (eYFP)                                                                        | Nosepokes                     | 0.184                                                                                                                              |
| <i>Figure 5H</i> | Two-way ANOVA with Holm-Sidak's post hoc test               | 10 mice (NAcMed Chr2)<br>6 mice (NAcMed eYFP)<br>9 mice (NAcLat Chr2)<br>8 mice (NAcLat eYFP)          | Time spent in neutral area's. | Effect of projection: 0.0004<br>Effect of Chr2: 0.9441<br>Interaction: 0.0002<br>Post hoc:<br>NAcMed->mVTA vs NAcMed->IVTA: 0.0097 |
| <i>Figure 5I</i> | One-way repeated measures ANOVA with Tukey's post hoc test. | 10 mice                                                                                                | Time spent in open arms.      | Effect of stimulation: 0.0146<br>Post hoc:<br>off vs on: 0.9191<br>off vs off: 0.0664<br>on vs off: 0.0484                         |
| <i>Figure 6C</i> | Unpaired t-test                                             | 7 cells (DA->NAcLat)<br>6 cells (DA->NAcMed)<br>from 3 mice                                            | Maximum current               | 0.0024                                                                                                                             |
| <i>Figure 6F</i> | Unpaired t-test                                             | 18 cells (ACSF)<br>8 cell (CGP)<br>from 6 mice                                                         | GABA-B current                | 0.0028                                                                                                                             |
| <i>Figure 6G</i> | One-way repeated measures ANOVA with Tukey's post hoc test. | 7 cells from 5 mice                                                                                    | Firing frequency              | Main effect: 0.0007<br>Post hoc:<br>off vs ACSF: 0.0066<br>off vs CGP: 0.4306<br>ACSF vs CGP: 0.0081                               |
| <i>Figure 6H</i> | One-way repeated measures ANOVA with Tukey's post hoc test. | 10 cells from 4 mice                                                                                   | Firing frequency              | Main effect: < 0.0001<br>Post hoc:<br>off vs ACSF: 0.0004<br>off vs CGP: 0.0004<br>ACSF vs CGP: 0.994                              |
| <i>Figure 7C</i> | Paired t-test                                               | 6 mice                                                                                                 | Time spent in compartment     | 0.4353                                                                                                                             |

|                    |                                                             |                                                                |                           |                                                                                                            |
|--------------------|-------------------------------------------------------------|----------------------------------------------------------------|---------------------------|------------------------------------------------------------------------------------------------------------|
| Figure 7D          | Paired t-test                                               | 6 mice                                                         | Time spent in compartment | <0.0001                                                                                                    |
| Figure 7E          | One-way repeated measures ANOVA with Tukey's post hoc test. | 6 mice                                                         | Time spent in open arms.  | Effect of stimulation: 0.0024<br>Post hoc:<br>off vs on: 0.9996<br>off vs off: 0.0203<br>on vs off: 0.0219 |
| Figure 7F          | One-way repeated measures ANOVA with Tukey's post hoc test. | 6 mice                                                         | Time spent in open arms.  | Effect of stimulation: 0.2469<br>Post hoc:<br>off vs on: 0.4417<br>off vs off: 0.5688<br>on vs off: 0.435  |
| Figure S2D         | Unpaired t-test                                             | 23 cells (NAcLat)<br>23 cells (NAcMed)<br>from 3 mice          | IPSC amplitude            | 0.0352                                                                                                     |
| Figure S2J         | Unpaired t-test                                             | 11 cells (DA->NAcLat)<br>13 cells (DA->NAcMed)<br>from 5 mice  | IPSC amplitude            | 0.0005                                                                                                     |
| Figure S4A panel 1 | One-way repeated measures ANOVA with Tukey's post hoc test. | 9 mice                                                         | Track length              | Effect of stimulation: 0.364<br>Post hoc:<br>off vs on: 0.2881<br>off vs off: 0.0565<br>on vs off: 0.0675  |
| Figure S4A panel 2 | One-way repeated measures ANOVA with Tukey's post hoc test. | 9 mice                                                         | Velocity                  | Effect of stimulation: 0.0386<br>Post hoc:<br>off vs on: 0.302<br>off vs off: 0.0546<br>on vs off: 0.0702  |
| Figure S4A panel 3 | One-way repeated measures ANOVA with Tukey's post hoc test. | 9 mice                                                         | Time in center            | Effect of stimulation: 0.2456<br>Post hoc:<br>off vs on: 0.6876<br>off vs off: 0.3717<br>on vs off: 0.5364 |
| Figure S4B panel 1 | One-way repeated measures ANOVA with Tukey's post hoc test. | 10 mice                                                        | Track length              | Effect of stimulation: 0.0001<br>Post hoc:<br>off vs on: 0.263<br>off vs off: 0.0031<br>on vs off: 0.0006  |
| Figure S4B panel 2 | One-way repeated measures ANOVA with Tukey's post hoc test. | 10 mice                                                        | Velocity                  | Effect of stimulation: 0.0001<br>Post hoc:<br>off vs on: 0.2646<br>off vs off: 0.003<br>on vs off: 0.0005  |
| Figure S4B panel 3 | One-way repeated measures ANOVA with Tukey's post hoc test. | 10 mice                                                        | Time in center            | Effect of stimulation: 0.0862<br>Post hoc:<br>off vs on: 0.1505<br>off vs off: 0.8191<br>on vs off: 0.0614 |
| Figure S5D         | Paired t-test                                               | 6 mice                                                         | Time spent in compartment | 0.3376                                                                                                     |
| Figure S5E         | Paired t-test                                               | 6 mice                                                         | Number of entries         | 0.121                                                                                                      |
| Figure S6E         | Chi-square test                                             | NAcMed: 162 cells from 3 mice<br>NAcLat: 180 cells from 4 mice | Number of cells           | <0.0001                                                                                                    |
| Figure S6I         | Unpaired t-test                                             | 9 cells (TH-)<br>8 cells (TH+)<br>from 4 mice                  | Maximum Current           | 0.4558                                                                                                     |
| Figure S7C         | One-way repeated measures ANOVA with Tukey's post hoc test. | 9 cells from 5 mice                                            | Firing frequency          | Main effect: 0.014<br>Post hoc:<br>off vs ACSF: 0.0276<br>off vs CGP: 0.0435<br>ACSF vs CGP: 0.6627        |
| Figure S7D         | One-way repeated measures ANOVA with Tukey's post hoc test. | 14 cells from 4 mice                                           | Firing frequency          | Main effect: 0.0348<br>Post hoc:<br>off vs ACSF: 0.5225<br>off vs CGP: 0.1285<br>ACSF vs CGP: 0.0511       |
